# Supplementary material for: optimalFlow: optimal transport approach to flow cytometry gating and population matching
Source: Springer Nature journal article supplement (doi:10.1186/s12859-020-03795-w), 2020-10-27
Supplement: 12859_2020_3795_MOESM1_ESM.pdf [file 12859_2020_3795_MOESM1_ESM.pdf]

## Notions on optimal transport

Following (1), let us take  $\mathcal{P}(\Omega)$ , the space of probability distributions on  $\Omega$ . For  $\mu, \nu$  in  $\mathcal{P}(\Omega)$ , let us define  $\Pi(\mu, \nu)$  the set of all probability measures  $\pi$  on  $\Omega \times \Omega$  with first marginal  $\mu$  and second marginal  $\nu$ . The optimal transport cost between the two measures is defined as

$$C(\mu, \nu) = \inf_{\pi \in \Pi(\mu, \nu)} \int c(x, y) d\pi(x, y) \quad (1)$$

where  $c(x, y)$  is the cost of transporting one unit of mass from  $x$  to  $y$ . A probability  $\pi$  that achieves the minimum in (1) is called an optimal coupling, with an associated random variable  $(X, Y)$  that has joint distribution  $\pi$ . When  $\mu$  and  $\nu$  are discrete, i.e.,  $\mu = \sum_{i=1}^n p_i \delta_{x_i}$  and  $\nu = \sum_{j=1}^m q_j \delta_{y_j}$ , with  $x_i, y_j \in \mathbb{R}^d$ , the optimal transport problem can be solved as a linear program (see (2)) where

$$C(\mu, \nu) = \sum_{i=1}^n \sum_{j=1}^m w_{ij}^* c(x_i, y_j),$$

and  $(w_{ij}^*)$  are the solutions of the optimal transport linear program

$$\begin{aligned} & \text{minimize} && \sum_{i=1}^n \sum_{j=1}^m w_{ij} c(x_i, y_j) \\ & \text{subject to} && w_{ij} \geq 0, && 1 \leq i \leq n, 1 \leq j \leq m \\ & && \sum_{j=1}^m w_{ij} = p_i, && 1 \leq i \leq n \\ & && \sum_{i=1}^n w_{ij} = q_j, && 1 \leq j \leq m \\ & && \sum_{i=1}^n \sum_{j=1}^m w_{ij} = 1. \end{aligned}$$

For  $(\Omega = \mathbb{R}^d, \|\cdot\|)$ , with  $\|\cdot\|$  the Euclidean norm, and  $p \in [1, \infty)$ , the  $p$ -Wasserstein distance between  $\mu$  and  $\nu$  is defined as

$$\begin{aligned} \mathcal{W}_p^p(\mu, \nu) &= \inf_{\pi \in \Pi(\mu, \nu)} \int \|x - y\|^p d\pi(x, y) \\ &= \inf \{E\|X - Y\|^p, \mathcal{L}(X) = \mu, \mathcal{L}(Y) = \nu\}, \end{aligned}$$

where  $\mathcal{L}(X)$  refers to the law of  $X$ .

We present the entropy regularized Wasserstein distance, since it is strictly convex and there are efficient solutions based on the Sinkhorn algorithm (see (3)). For a fixed  $\gamma > 0$  the regularized Wasserstein distance is defined as

$$\mathcal{W}_\gamma(\mu, \nu) = \sum_{i=1}^n \sum_{j=1}^m w_{ij}^* \|x_i - y_j\|^2 + \gamma \sum_{i=1}^n \sum_{j=1}^m w_{ij}^* \log w_{ij}^*, \quad (2)$$

where  $(w_{ij}^*)$  are the solutions of the optimal transport linear program

$$\begin{aligned} & \text{minimize} && \sum_{i=1}^n \sum_{j=1}^m w_{ij} \|x_i - y_j\|^2 + \gamma \sum_{i=1}^n \sum_{j=1}^m w_{ij} \log w_{ij} \\ & \text{subject to} && w_{ij} \geq 0, && 1 \leq i \leq n, 1 \leq j \leq m \\ & && \sum_{j=1}^m w_{ij} = p_i, && 1 \leq i \leq n \\ & && \sum_{i=1}^n w_{ij} = q_j, && 1 \leq j \leq m \\ & && \sum_{i=1}^n \sum_{j=1}^m w_{ij} = 1. \end{aligned}$$

Let us denote  $\mathcal{P}_2(\mathbb{R}^d)$  the set of probability measures on  $\mathbb{R}^d$  with finite second moment and let us consider  $\mathcal{W}_2(\mu, \nu)$  for  $\mu, \nu \in \mathcal{P}(\mathbb{R}^d)$ . In (4) the notions of  $k$ -barycenter and trimmed  $k$ -barycenter were introduced, building on the concept of Wasserstein barycenter introduced in

(5; 6). A  $k$ -barycenter of probabilities  $\{\mu_1, \dots, \mu_n\}$  in  $\mathcal{P}_2(\mathbb{R}^d)$  with weights  $\lambda_1, \dots, \lambda_n$  is any  $k$ -set  $\{\bar{\mu}_1, \dots, \bar{\mu}_k\}$  in  $\mathcal{P}_2(\mathbb{R}^d)$  such that for any  $\{\nu_1, \dots, \nu_k\} \subset \mathcal{P}_2(\mathbb{R}^d)$  we have that

$$\sum_{i=1}^n \lambda_i \min_{j \in \{1, \dots, k\}} \mathcal{W}_2^2(\mu_i, \bar{\mu}_j) \leq \sum_{i=1}^n \lambda_i \min_{j \in \{1, \dots, k\}} \mathcal{W}_2^2(\mu_i, \nu_j). \quad (3)$$

An  $\alpha$ -trimmed  $k$ -barycenter of  $\{\mu_1, \dots, \mu_n\}$  with weights as before is any  $k$ -set  $\{\bar{\mu}_1, \dots, \bar{\mu}_k\}$  with weights  $\bar{\lambda} = (\bar{\lambda}_1, \dots, \bar{\lambda}_n) \in \Lambda_\alpha(\lambda)$  such that

$$\sum_{i=1}^n \bar{\lambda}_i \min_{j \in \{1, \dots, k\}} \mathcal{W}_2^2(\mu_i, \bar{\mu}_j) = \min_{\{\nu_1, \dots, \nu_k\} \subset \mathcal{P}_2(\mathbb{R}^d), \lambda^* \in \Lambda_\alpha(\lambda)} \sum_{i=1}^n \lambda_i^* \min_{j \in \{1, \dots, k\}} \mathcal{W}_2^2(\mu_i, \nu_j), \quad (4)$$

where  $\Lambda_\alpha(\lambda) = \{\lambda^* = (\lambda_1^*, \dots, \lambda_n^*) : 0 \leq \lambda_i^* \leq \lambda_i / (1 - \alpha), \sum_{i=1}^n \lambda_i^* = 1\}$ .

Broadly speaking  $k$ -barycenters can be thought of as an extension of  $k$ -means to the space of probabilities with finite second order, since we can rewrite (3) as

$$\min_{\mathfrak{S}} \sum_{j=1}^k \sum_{\mu_i \in \mathfrak{S}_j} \lambda_i \mathcal{W}_2^2(\mu_i, \bar{\mu}_j) \quad (5)$$

where  $\mathfrak{S} = \{\mathfrak{S}_1, \dots, \mathfrak{S}_k\}$  is a partition of  $\{\mu_1, \dots, \mu_n\}$  and  $\bar{\mu}_j$  is the barycenter of the elements in  $\mathfrak{S}_j$ . Therefore, trimmed  $k$ -barycenters may be matched to trimmed  $k$ -means. As stated in (4), efficient computations can be done when dealing with location-scatter families of absolutely continuous distributions in  $\mathcal{P}_2(\mathbb{R}^d)$ . A notable example being the family of multivariate Gaussian distributions.

## References

- [1] Villani, C.: Optimal Transport: Old and New. Springer, (2009)
- [2] Bertsimas, D., Tsitsiklis, J.: Introduction to Linear Optimization. Athena Scientific, (1997)
- [3] Cuturi, M., Doucet, A.: Fast computation of wasserstein barycenters. PMLR 32, 685–693 (2014)
- [4] del Barrio, E., Cuesta-Albertos, J., Matrán, C., Mayo-Íscar, A.: Robust clustering tools based on optimal transportation. Statistics and Computing **29**, 139–160 (2019)
- [5] Boissard, E., Le Gouic, T., Loubes, J.-M., *et al.*: Distribution’s template estimate with wasserstein metrics. Bernoulli **21**(2), 740–759 (2015)
- [6] Gouic, T.L., Loubes, J.: Existence and consistency of wasserstein barycenters. Probab Theory Rel **168**, 901–917 (2017)
